# Supplementary material for: Phase I Dose-Finding Study of OPB-111077, a Novel STAT3 Inhibitor, in Patients with Advanced Hepatocellular Carcinoma
Source: PubMed Central journal article supplement — Cancer Res Treat. 2018 Jun 13;51(2):510–8. doi: 10.4143/crt.2018.226 (PMC6473286; doi:10.4143/crt.2018.226), 2018-06-13
Supplement: crt-2018-226-suppl2.pdf [file crt-2018-226-suppl2.pdf]

**S1 Table.** Disease control rate according to the dosing cohort

|                                   | OPB-111077 once daily dosing     |                                |                                   |                                   |                                                       | OPB-111077 the 4-days on/3-days off dosing |                                   |                                   |                                   |                                   |                   |
|-----------------------------------|----------------------------------|--------------------------------|-----------------------------------|-----------------------------------|-------------------------------------------------------|--------------------------------------------|-----------------------------------|-----------------------------------|-----------------------------------|-----------------------------------|-------------------|
|                                   | 50 mg<br>OPB-<br>111077<br>(n=3) | 300<br>OPB-<br>111077<br>(n=4) | 500 mg<br>OPB-<br>111077<br>(n=3) | 600 mg<br>OPB-<br>111077<br>(n=6) | Overall<br>(4-days<br>on/<br>3-days<br>off)<br>(n=13) | Overall<br>(both<br>regimens)<br>(n=31)    | 100 mg<br>OPB-<br>111077<br>(n=4) | 150 mg<br>OPB-<br>111077<br>(n=3) | 200 mg<br>OPB-<br>111077<br>(n=3) | 250 mg<br>OPB-<br>111077<br>(n=5) | Overall<br>(n=18) |
| Disease control rate at 6 wk (%)  | 66.7                             | 50.0                           | 66.7                              | 16.7                              | 38.5                                                  | 41.9                                       | 50.0                              | 33.3                              | 33.3                              | 40.0                              | 44.4              |
| 95% CI                            | 9.4-99.2                         | 6.8-93.2                       | 9.4-99.2                          | 0.4-64.1                          | 13.9-68.4                                             | 24.5-60.9                                  | 6.8-93.2                          | 0.8-90.6                          | 0.8-90.6                          | 5.3-85.3                          | 21.5-69.2         |
| Disease control rate at 12 wk (%) | 33.3                             | 25.0                           | 0                                 | 0                                 | 7.7                                                   | 22.6                                       | 50.0                              | 33.3                              | 33.3                              | 20.0                              | 33.3              |
| 95% CI                            | 0.8-90.6                         | 0.6-80.6                       | -                                 | -                                 | 0.2-36.0                                              | 9.6-41.1                                   | 6.8-93.2                          | 0.8-90.6                          | 0.8-90.6                          | 0.5-71.6                          | 13.3-59.0         |

CI, confidence interval.
