# Supplementary material for: Phase I Dose-Finding Study of OPB-111077, a Novel STAT3 Inhibitor, in Patients with Advanced Hepatocellular Carcinoma
Source: PubMed Central journal article supplement — Cancer Res Treat. 2018 Jun 13;51(2):510–8. doi: 10.4143/crt.2018.226 (PMC6473286; doi:10.4143/crt.2018.226), 2018-06-13
Supplement: crt-2018-226-suppl3.pdf [file crt-2018-226-suppl3.pdf]

**S2 Table.** Summary of the pharmacokinetic parameters of OPB-111077 following single dose administration for the once daily dosing regimen

| Parameter                         | Dose of OPB-111077 |                  |                  |                  |                    |
|-----------------------------------|--------------------|------------------|------------------|------------------|--------------------|
|                                   | 50 mg (n=3)        | 100 mg (n=4)     | 150 mg (n=3)     | 200 mg (n=3)     | 250 mg (n=6)       |
| AUC <sub>t</sub> (ng·hr/mL)       | 18,600.0±1,190.0   | 50,000.0±8,900.0 | 60,300.0±2,400.0 | 80,300.0±8,600.0 | 109,000.0±27,200.0 |
| AUC <sub>(0-24)</sub> (ng·hr/mL)  | 12,800.0±750.0     | 32,300.0±7,040.0 | 40,800.0±3,840.0 | 53,800.0±9,450.0 | 81,000.0±20,600.0  |
| AUC <sub>∞</sub> (ng·hr/mL)       | 19,500.0±1,150.0   | 54,400.0±9,340.0 | 63,000.0±2,340.0 | 85,400.0±6,570.0 | 112,000.0±28,300.0 |
| C <sub>max</sub> (ng/mL)          | 1,140.0±172.0      | 3,220.0±741.0    | 3,510.0±177.0    | 5,270.0±2,100.0  | 7,190.0±1,380.0    |
| t <sub>max</sub> (hr)             | 1.0 (1.0-8.0)      | 2.0 (2.0-4.0)    | 4.0 (2.0-4.0)    | 2.0 (0.5-4.0)    | 4.0 (2.0-5.0)      |
| AUC <sub>t</sub> /D (ng·hr/mL/mg) | 406.0±26.0         | 546.0±97.1       | 439.0±17.5       | 438.0±46.9       | 477.0±119.0        |
| AUC <sub>∞</sub> /D (ng·hr/mL/mg) | 425.0±25.2         | 593.0±102.0      | 458.0±17.0       | 466.0±35.8       | 489.0±124.0        |
| C <sub>max</sub> /D (ng/mL/mg)    | 24.9±3.8           | 35.1±8.1         | 25.5±1.3         | 28.7±11.5        | 31.4±6.0           |
| t <sub>1/2,z</sub> (hr)           | 15.9±1.9           | 19.5±4.2         | 15.4±2.0         | 17.4±3.5         | 13.0±2.1           |
| CL/F (L/hr)                       | 2.4±0.1            | 1.7±0.3          | 2.2±0.1          | 2.2±0.2          | 2.2±0.5            |
| V <sub>z</sub> /F (L)             | 54.3±7.9           | 48.9±15.8        | 48.7±6.5         | 54.7±14.6        | 39.8±8.8           |

Values are presented as mean±standard deviation or median (min-max). AUC<sub>t</sub>, area under the concentration-time curve from hour 0 to the last measurable concentration; AUC<sub>(0-24)</sub>, area under the concentration-time from hour 0 to hour 24; AUC<sub>∞</sub>, area under the concentration-time extrapolated to infinity; C<sub>max</sub>, maximum observed plasma concentration; t<sub>max</sub>, time to maximum observed plasma concentration; AUC<sub>t</sub>/D, dose normalized AUC<sub>t</sub>; AUC<sub>∞</sub>/D, dose normalized AUC<sub>∞</sub>; C<sub>max</sub>/D, dose normalized C<sub>max</sub>; t<sub>1/2,z</sub>, apparent terminal elimination half-life; CL/F, apparent total clearance; V<sub>z</sub>/F, apparent volume of distribution.
